# Supplementary material
Source: ML conference proceedings conference paper supplement (https://www.ecva.net/papers/eccv_2020/papers_ECCV/html/123600205_ECCV_2020_paper.php)
Supplement: Supplementary file 3 [file 123600205-supp.zip]

Archive with 32 entries (31 files):
- supple.pdf
- __MACOSX/._supple.pdf
- video sample/
- __MACOSX/._video sample
- video sample/A turtle on the bottom of the aquarium, with another turtle on top.gif
- __MACOSX/video sample/._A turtle on the bottom of the aquarium, with another turtle on top.gif
- video sample/.DS_Store
- __MACOSX/video sample/._.DS_Store
- video sample/A person is showing his skate board skills on the road.gif
- __MACOSX/video sample/._A person is showing his skate board skills on the road.gif
- video sample/A big mother white tiger is sitting on the left.gif
- __MACOSX/video sample/._A big mother white tiger is sitting on the left.gif
- video sample/A rabbit jumps in to the cage.gif
- __MACOSX/video sample/._A rabbit jumps in to the cage.gif
- video sample/A white mouse in a black shoe.gif
- __MACOSX/video sample/._A white mouse in a black shoe.gif
- video sample/A red tennis racket.gif
- __MACOSX/video sample/._A red tennis racket.gif
- video sample/A giraffe is walking on the grass field from the left.gif
- __MACOSX/video sample/._A giraffe is walking on the grass field from the left.gif
- video sample/A person standing bottom right with sleeveless showing his back.gif
- __MACOSX/video sample/._A person standing bottom right with sleeveless showing his back.gif
- video sample/A panda with a bushy tail walking down a branch of a tree.gif
- __MACOSX/video sample/._A panda with a bushy tail walking down a branch of a tree.gif
- video sample/A brown duck in the grass between two others looking down.gif
- __MACOSX/video sample/._A brown duck in the grass between two others looking down.gif
- video sample/A person in a red hoodie.gif
- __MACOSX/video sample/._A person in a red hoodie.gif
- video sample/The human hand is near the brown mouse and bowl of food.gif
- __MACOSX/video sample/._The human hand is near the brown mouse and bowl of food.gif
- video sample/A bus is moving in the road from right to left.gif
- __MACOSX/video sample/._A bus is moving in the road from right to left.gif
