# Supplementary material
Source: ML conference proceedings conference paper supplement (https://www.ecva.net/papers/eccv_2020/papers_ECCV/html/123600205_ECCV_2020_paper.php)

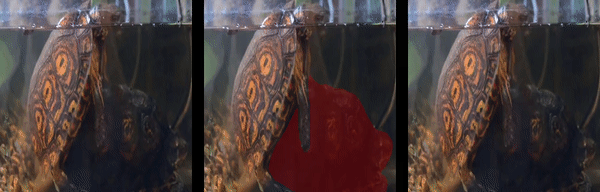

Supplement: Supplementary file 3 [file 123600205-supp.zip › video sample/A turtle on the bottom of the aquarium, with another turtle on top.gif]

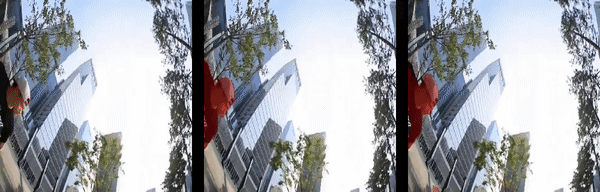

Supplement: Supplementary file 3 [file 123600205-supp.zip › video sample/A person is showing his skate board skills on the road.gif]

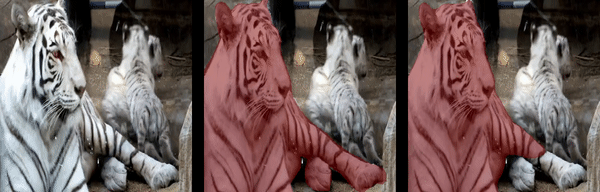

Supplement: Supplementary file 3 [file 123600205-supp.zip › video sample/A big mother white tiger is sitting on the left.gif]

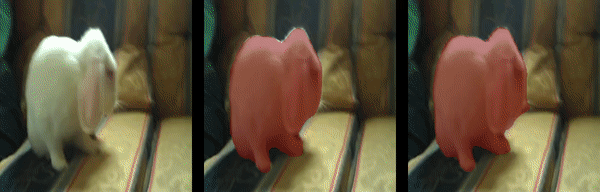

Supplement: Supplementary file 3 [file 123600205-supp.zip › video sample/A rabbit jumps in to the cage.gif]

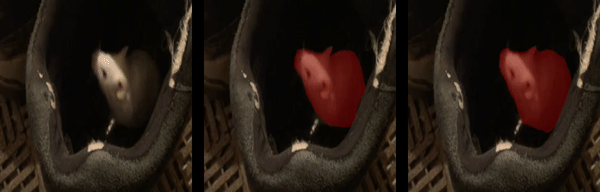

Supplement: Supplementary file 3 [file 123600205-supp.zip › video sample/A white mouse in a black shoe.gif]

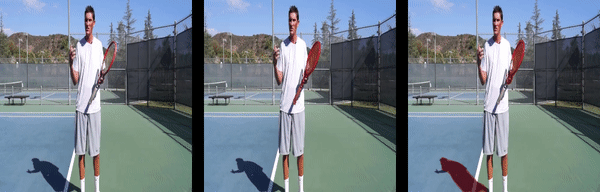

Supplement: Supplementary file 3 [file 123600205-supp.zip › video sample/A red tennis racket.gif]

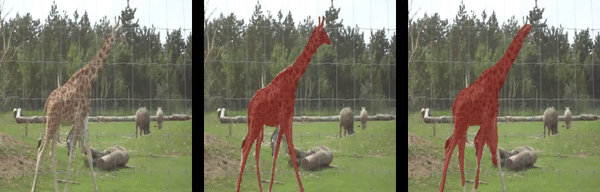

Supplement: Supplementary file 3 [file 123600205-supp.zip › video sample/A giraffe is walking on the grass field from the left.gif]

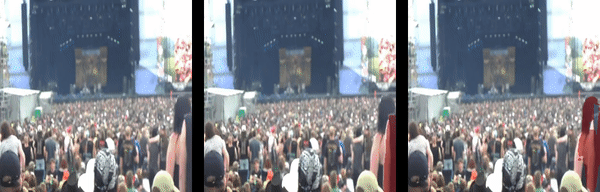

Supplement: Supplementary file 3 [file 123600205-supp.zip › video sample/A person standing bottom right with sleeveless showing his back.gif]

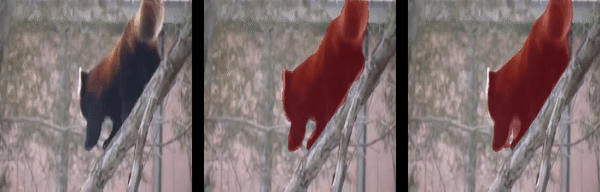

Supplement: Supplementary file 3 [file 123600205-supp.zip › video sample/A panda with a bushy tail walking down a branch of a tree.gif]

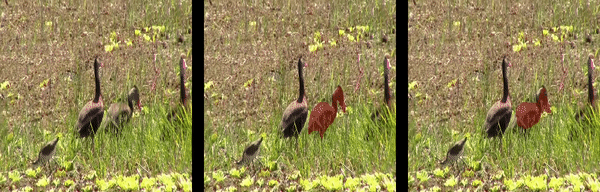

Supplement: Supplementary file 3 [file 123600205-supp.zip › video sample/A brown duck in the grass between two others looking down.gif]

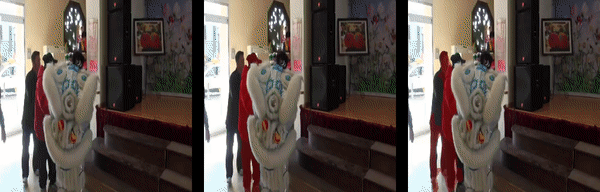

Supplement: Supplementary file 3 [file 123600205-supp.zip › video sample/A person in a red hoodie.gif]

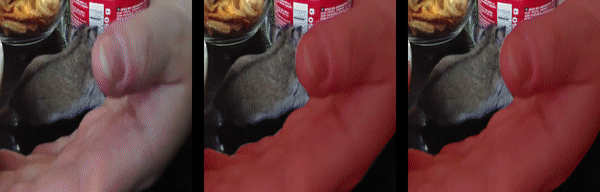

Supplement: Supplementary file 3 [file 123600205-supp.zip › video sample/The human hand is near the brown mouse and bowl of food.gif]

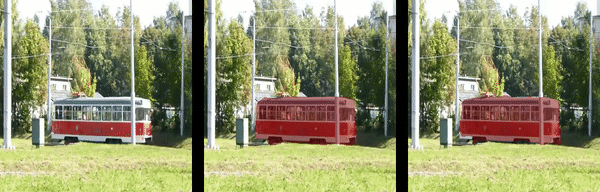

Supplement: Supplementary file 3 [file 123600205-supp.zip › video sample/A bus is moving in the road from right to left.gif]
